# Supplementary material for: Auranofin Mediates Mitochondrial Dysregulation and Inflammatory Cell Death in Human Retinal Pigment Epithelial Cells: Implications of Retinal Neurodegenerative Diseases
Source: PubMed Central journal article supplement (PMC6795687; doi:10.3389/fnins.2019.01065), 2019-10-10
Supplement: Data_Sheet_1.pdf [file Data_Sheet_1.pdf]

## Yumnamcha *et al.*, AF, Redox imbalance, mitophagic flux and RPE dysfunction

### I. Supplementary Data: (Tables)

**Table 1. Chemical List:**

| Serial No. | Name of Chemical                         | Name of Company | Catalog No    | Lot No  |
|------------|------------------------------------------|-----------------|---------------|---------|
| 1          | Auranofin                                | Sigma Aldric    | A6733         | N/A     |
| 2          | Amlexanox                                | Sigma Aldric    | SML0517       | N/A     |
| 3          | SS31                                     | ANASPEC         | 1757720       | N/A     |
| 4          | SS31-488                                 | ANASPEC         | 1757721       | N/A     |
| 5          | Tranilast                                | Sigma Aldric    | T0318         | N/A     |
| 6          | Mdiv-1                                   | Sigma Aldric    | M0199         | N/A     |
| 7          | Leu-Leu methyl ester hydrobromide (LLME) | Sigma Aldric    | L7393         | N/A     |
| 8          | MCC950 (NLRP3 Inhibitor)                 | Calbiochem      | 5.38120.0001  | 3131820 |
| 9          | Ac-YVAD-cmk (Caspase-1 inhibitor)        | Sigma Aldric    | SML0429       | N/A     |
| 10         | Necrostatin-1 (Necroptosis inhibitor)    | EMD Millipore   | CAS 4311-88-0 | N/A     |
| 11.        | Ferroptosis inhibitor, Ferrostatin-1     | Sigma Aldric    | SML0583       | N/A,    |

**Table 2A. Antibodies: Primary antibodies for Western blotting**

| Name     | Dilution | Species | Company         | Cat #      |
|----------|----------|---------|-----------------|------------|
| TrxR1    | 1:1000   | mouse   | MBL             | K0205-3    |
| TrxR2    | 1:1000   | Rabbit  | Cell Signalling | 14714S     |
| Trx1     | 1:500    | Rabbit  | Santa Cruz      | SC-20146   |
| Trx1     | 1:1000   | Rabbit  | Cell Signaling  | 2429S      |
| Trx2     | 1:500    | Rabbit  | Santa Cruz      | sc-50336   |
| Trx2     | 1:1000   | Rabbit  | Cell Signaling  | 14907S     |
| Actin    | 1:2000   | Goat    | Santa Cruz      | Sc-1616    |
| Actin    | 1:2000   | Rabbit  | Cell Signaling  | 4970S      |
| TFEB     | 1:500    | Rabbit  | Cell Signaling  | 32361S     |
| P53      | 1:500    | Mouse   | Cell Signaling  | 48818S     |
| Lamin B1 | 1:1000   | Rabbit  | Cell Signaling  | 12586      |
| LonP     | 1:500    | Rabbit  | ProteinTech     | 15440-1-AP |

|             |        |        |                |            |
|-------------|--------|--------|----------------|------------|
| YMEIL1      | 1:500  | Rabbit | ProteinTech    | 11510-1-AP |
| Tid1        | 1:1000 | Mouse  | Cell Signaling | 4775S      |
| PDIA6       | 1:1000 | Rabbit | Sigma          | SAB2101757 |
| Tom20       | 1:1000 | Rabbit | Cell Signaling | 42406S     |
| Tom20       | 1:1000 | Rabbit | ProteinTech    | 11802-1-AP |
| Optineurin  | 1:500  | Mouse  | Santa Cruz     | sc-166576  |
| P62/SQSTM1  | 1:1000 | Rabbit | ThermoFisher   | PA5-20839  |
| LC3B        | 1:3000 | Rabbit | Pierce         | L10382     |
| Gasdermin D | 1:1000 | Rabbit | Cell Signaling | 93709S     |

**Table 2B. Secondary Antibodies: for Western blotting**

| <b>Antibody</b>                            | <b>Source</b> | <b>Cat#</b> | <b>Dilution</b> |
|--------------------------------------------|---------------|-------------|-----------------|
| Anti-mouse 2 <sup>o</sup> ry antibody HRP  | Sigma         | A5278       | 1:2000          |
| Anti-rabbit 2 <sup>o</sup> ry antibody HRP | Sigma         | A6154       | 1:2000          |
| Anti-goat 2 <sup>o</sup> ry antibody HRP   | Santa Cruz    | sc-2020     | 1:2000          |
| Anti-rat 2 <sup>o</sup> ry antibody HRP    | Sigma         | A9542       | 1:2000          |

## II. Supplementary data: (Figures)

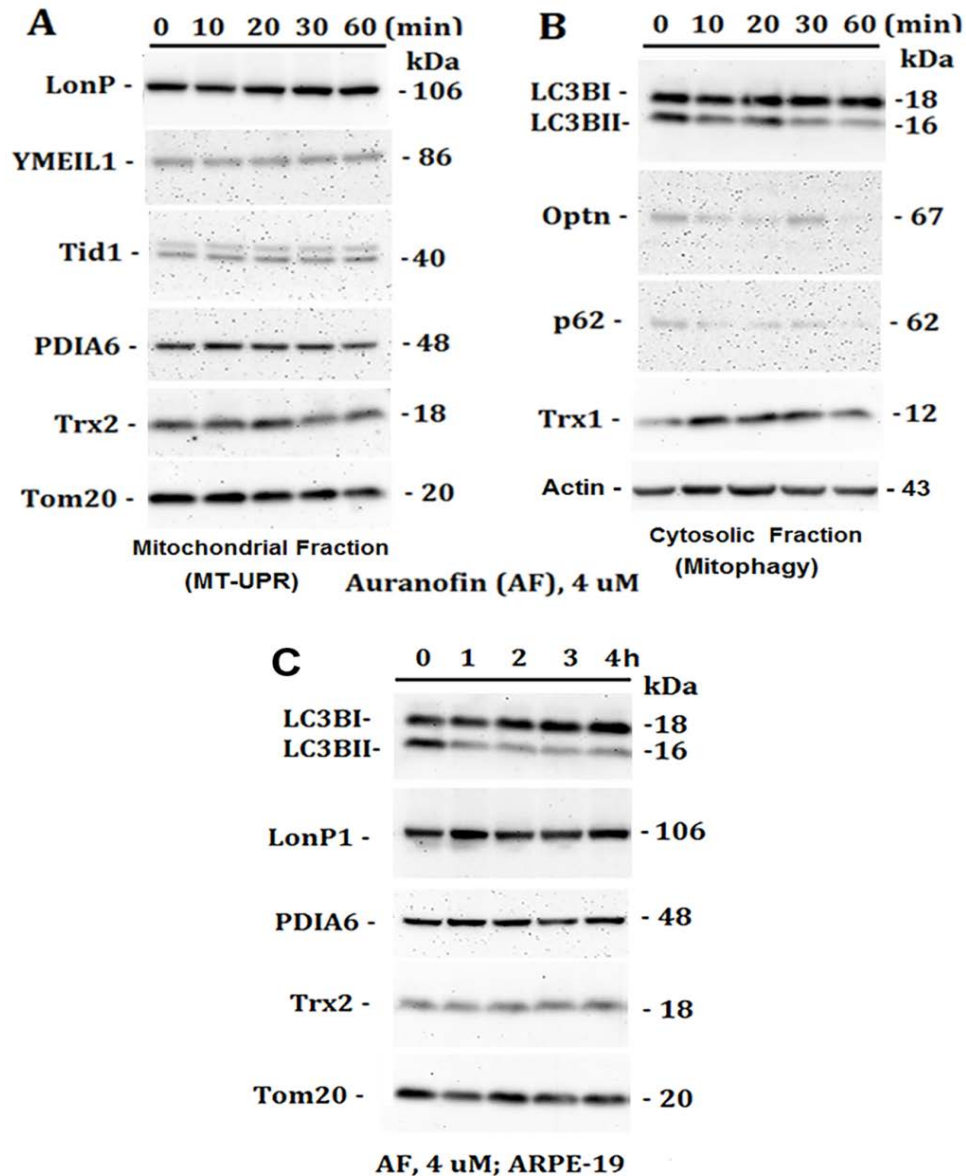

### Figure S1. Auranofin induces early mitophagic response and lacks mtUPR in ARPE-19 cells.

Mitochondrial oxidative stress causes protein misfolding and mitochondrial damage and mitochondrial protein stress responses including mitochondrial unfolded protein response (mtUPR) and mitophagy are activated. (A-C) However, in ARPE-19 cells, auranofin (AF, 4  $\mu$ M) treatment for various time periods does not alter the level of mtUPR proteins including mitochondrial proteases (LonP1 and YMEIL1) and chaperones (Tid1, PDIA6) and antioxidant Trx2 when normalized to Tom20. (B-C) However, there is an early mitophagic response in AF treatment of ARPE-19 cells as mitophagy markers LCBI, optineurin and p62 are reduced within minutes and continues up to 4h, indicating a flux to lysosomal degradation. A representative of n=3 is shown here for all proteins.

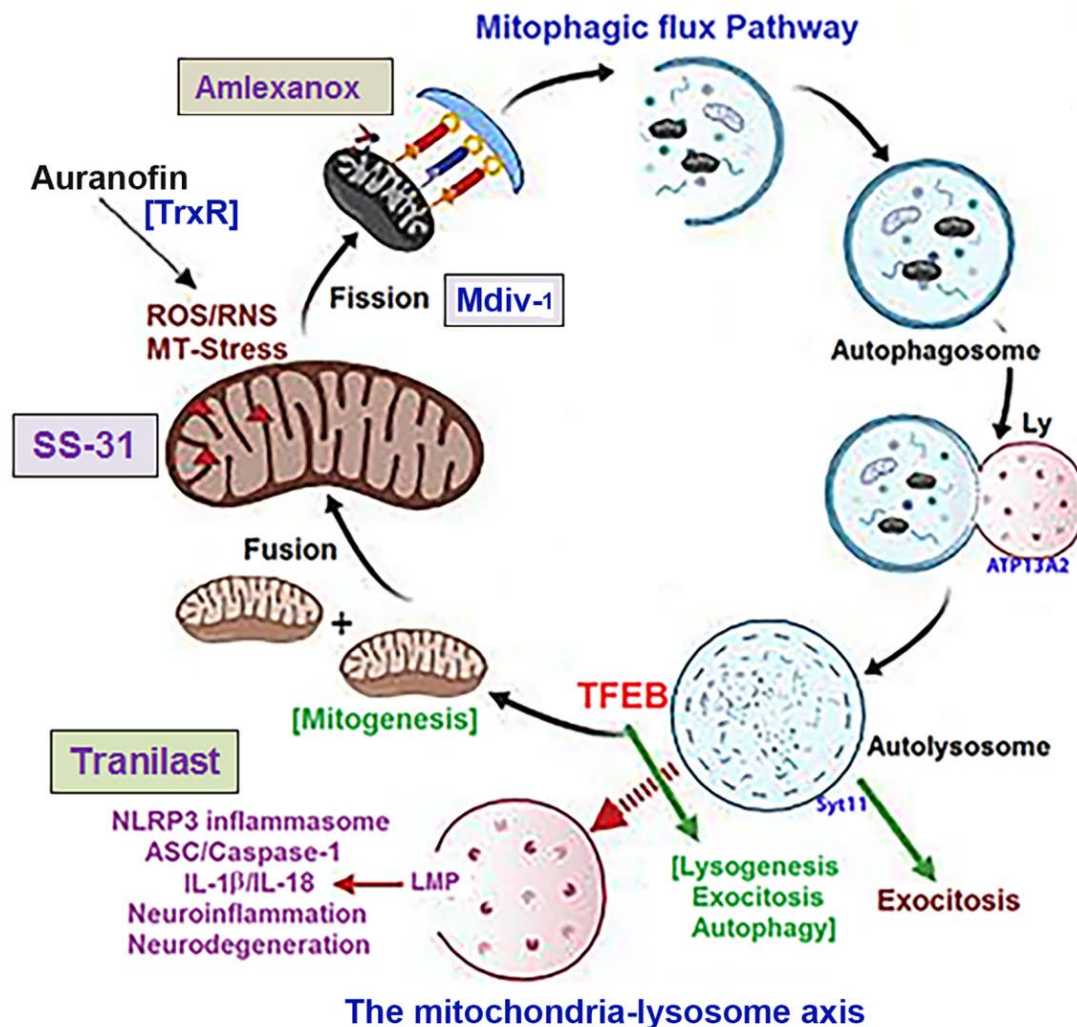

**Figure S2. A potential mechanism for mitochondrial quality control by mitophagic flux and mitogenesis involving lysosome in ARPE-19 cells.** Auranofin, which inhibits the redox protein TrxR, may induce mitochondrial stress, mito-fission, mitophagy flux, lysosome destabilization and inflammasome activation. Therefore, drugs that regulate the mitochondrial cycle may have protective effects in maintaining the mitophagy-lysosomal pathway under cellular stress. We tested in this study a number of drugs individually or in combinations of chemical inhibitors targeting this pathway, which includes SS31 (a mitochondria targeted anti-oxidant), Mdiv-1 (mitochondrial division inhibitor targeting Drp1), Amlexanox (an inhibitor of TBK1 kinase and optineurin/p62 phosphorylation) and Tranilast (an inhibitor of the NLRP3 inflammasome). The picture was drawn using BioRender free software.

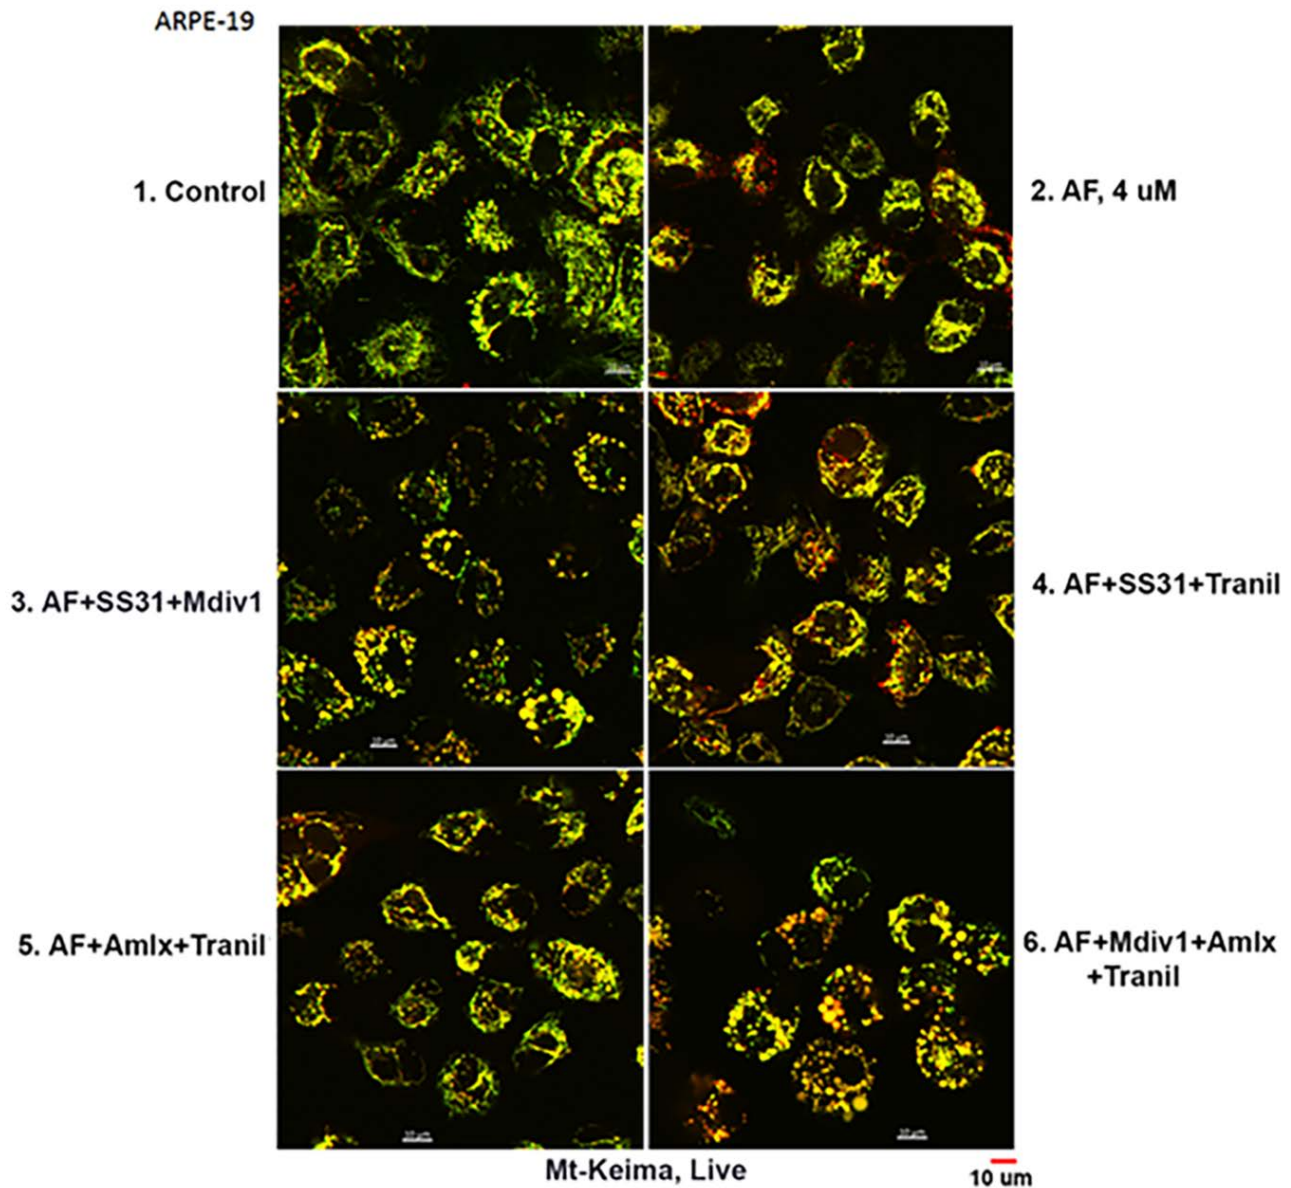

**Figure S3. Auranofin induces mitochondrial dysfunction and mitophagy flux in ARPE-19.** (1). In controls, mt-Keima are seen as green filaments while (2) AF (4  $\mu$ M) treatment of ARPE-19 for 4h induces mitophagic flux as demonstrated by increased red mt-Keima indicating mitophagic flux. Pre-incubation with different combinations of drugs (SS31, Mdiv-1, Amlexanox or Tranilast) were test for their effectiveness against AF-induced mitophagy. However, any of them individually (not shown) or in pairs (3-5) had no significant effects on AF-induced red mt-Keima (mitophagic flux). (6) A triple combination of SS31+Mdiv-1+Amlexanox, which inhibits mito-fission (by Mdiv-1), also cause mitochondrial vesiculation and dysfunction in the presence of AF. However, a triple combination treatment with SS31+ Amlexanox+Tranilast inhibited the AF-induced mitophagy as shown in Figure 4 in main manuscript. The concentration of inhibitors used are SS31 (4  $\mu$ M), Mdiv-1 (56.6  $\mu$ M), Amlexanox (4  $\mu$ M) and tranilast (56.5  $\mu$ M). A representative of n=3 confocal images (mag 630x) is shown here.

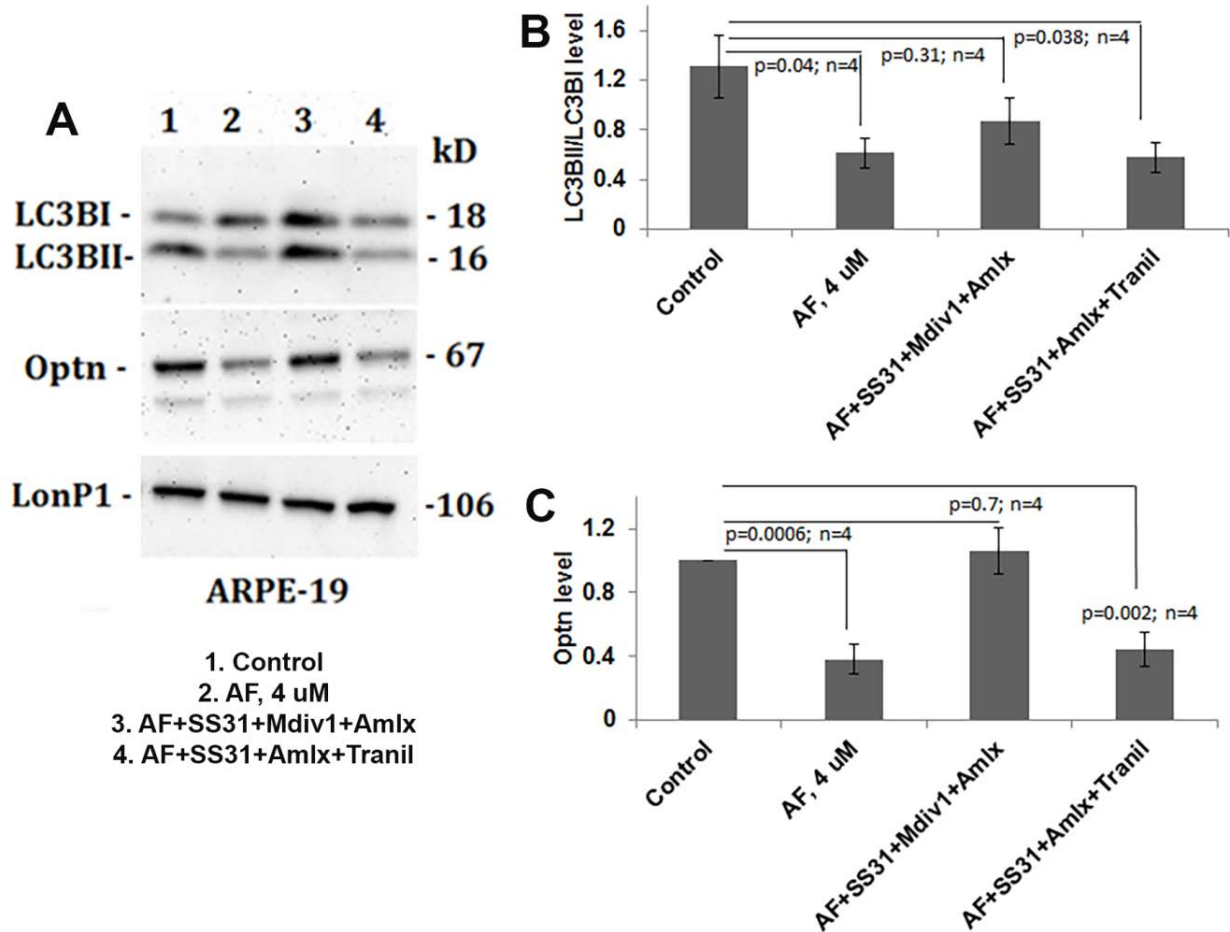

**Figure 4S. Auranofin induces mitophagy flux in ARPE-19.** Auranofin significantly reduces the level of mitophagy markers such as double membrane LC3BII (A-B) and adaptor Optineurin (A-C), which was normalized to mitochondrial protein LonP1. Pre-incubation with SS31+Mdiv-1+Amlx increases the level of LC3BII/I and Optineurin in the presence of AF suggesting mitophagy inhibition. This is due to the presence of and inhibition of mitophagic flux by Mdiv-1. On the other hand, SS31 + Amlexanox + tranilast still maintain an optimal mitophagic flux (reduced LC3BII/I and Optineurin as seen in lane 4, A). This observation suggests maintenance of the mitochondrial homeostasis even in the presence of AF. The concentration of inhibitors used are SS31 (4  $\mu$ M), Mdiv-1 (56.6  $\mu$ M), Amlexanox (4  $\mu$ M) and tranilast (56.5  $\mu$ M).

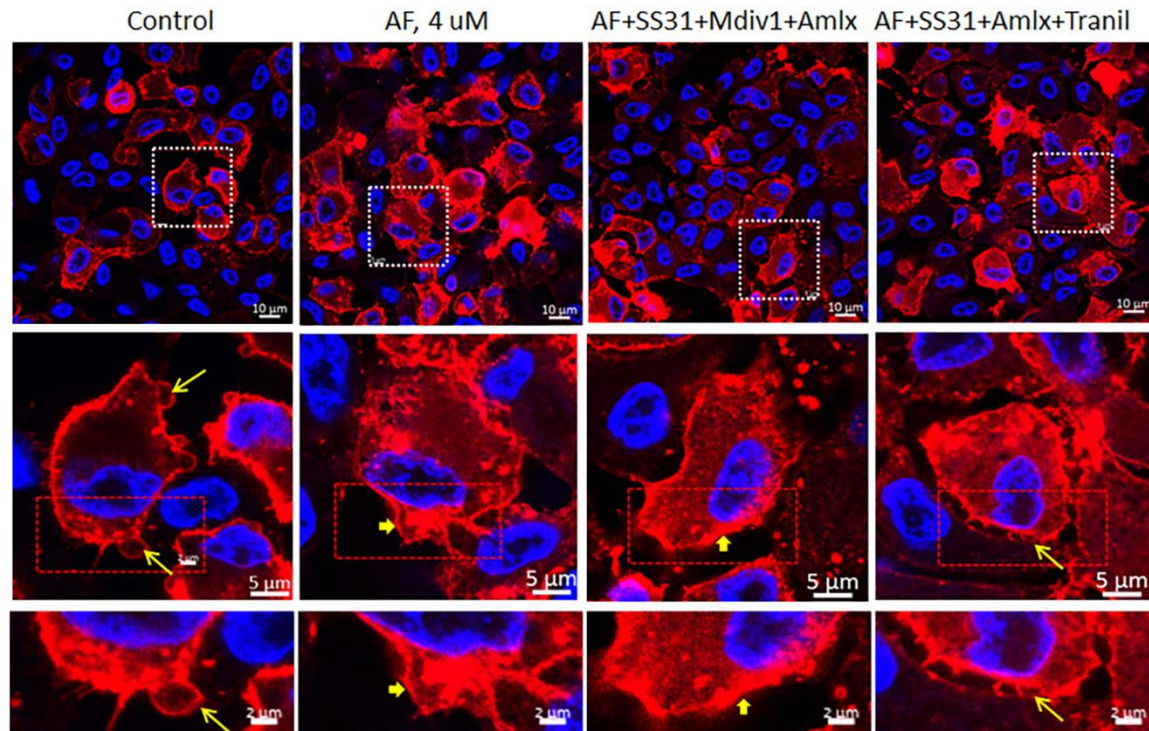

LAMP1-mCherry (lysosome) and Hoechst (nuclei)  
 ARPE-19, Pre-Treatment of inhibitors 2h before AF (4  $\mu$ M) for 4h

**Figure S5. AF causes lysosomal destabilization in ARPE-19.** We used lysosomal membrane protein LAMP1-mCherry to monitor lysosomal morphology after auranofin treatment in ARPE-19 (ref. 28). Ad-CMV-LAMP1-mCherry was transduced for 3 days to express LAMP1-mCherry and treated with AF (4  $\mu$ M, 4h). In controls, we observed lysosomal exocytosis at the plasma membrane (longer/narrow arrows), which is absent after treatment with AF (shorter/larger arrows). Preincubation with SS31+Mdiv-1+Amlexanox has no effect on LAMP1-mCherry (shorter/larger arrows at 3<sup>rd</sup> panel) while inclusion of SS31+Amlexanox+Tranilast restored LAMP1-mCherry exocytosis similar to that observed in controls (longer/thinner arrow). The concentration of inhibitors used are SS31 (4  $\mu$ M), Mdiv-1 (56.6  $\mu$ M), Amlexanox (4  $\mu$ M) and tranilast (56.5  $\mu$ M). Details of lysosomal fusion, fission and exocytosis in ARPE-19 cells in lysosomal stress will be studied in a separate manuscript. Lysosome dysfunction leads to many lysosomal storage disorders (LSD), which also affect the neurons and the central nervous system (Kielian T. Lysosomal storage disorders: pathology within the lysosome and beyond. *Neurochem.* 2019 Mar;148(5):568-572. doi: 10.1111/jnc.14672). A representative of n=3 confocal images is shown; mag. 630x.

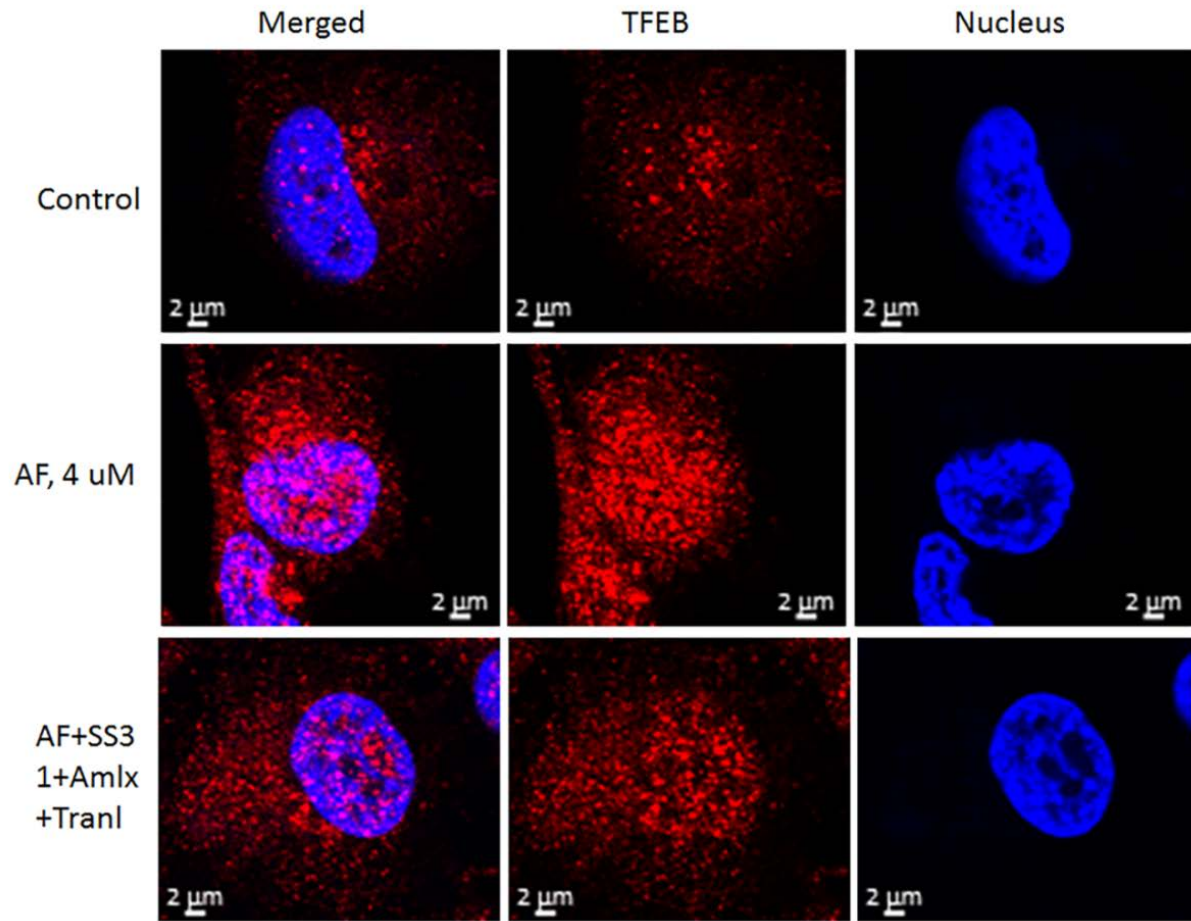

ARPE-19; AF, 4h; Inhibitor pretreated for 2h

**Figure S6. AF increase nuclear TFEB translocation and inhibited by triple combination drug treatment in ARPE-19.** AF treatment (4  $\mu$ M, 4h) of ARPE-19 induces nuclear translocation of transcription factor TFEB when compared with the control when examined under confocal microscopy. On the other hand, preincubation with a combination of SS31 (4  $\mu$ M) +Amlexanox (4  $\mu$ M)+Tranilast (56.5  $\mu$ M) reduces the AF-induced TFEB nuclear localization when compared to AF alone, suggesting a reduction in lysosomal stress in ARPE-19. A representative of n=3 is shown; mag. 630x.



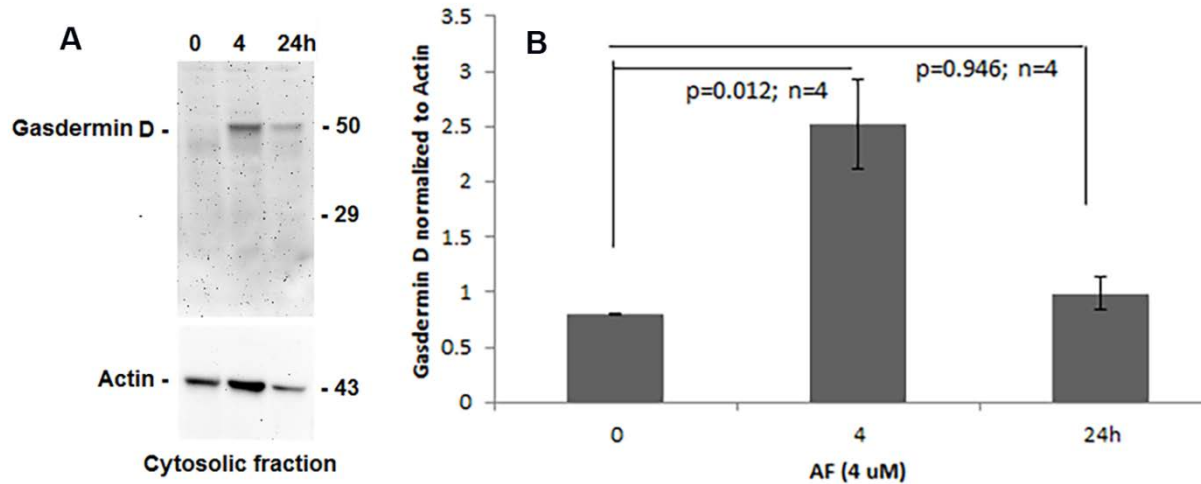

**Figure S7. AF increases Gasdermin D level in ARPE-19.** ARPE-19 cells were treated with AF (4  $\mu$ M) for 4 or 24 h. Cells were harvested and cytosolic fractions were prepared. On Western blots, Gasdermin D and actin were probed using respectively primary antibodies. We observed that AF increases Gasdermin D significantly at 4h and then reduces at 24h. Gasdermin D is cytoplasmic protein of 50 kD, which is cleaved by caspase-1 to generate a 29-kD N-terminus fragment that is then inserted into the plasma membrane to form a pore and membrane leakage. Therefore, gasdermin D is considered as a marker for caspase-1 dependent cell death by pyroptosis. The fact that there is an increase in cytosolic gasdermin D at 4h and a decrease at 24h may be due to integration in the plasma membrane in pyroptosis. However, we did not perform a plasma membrane fractionation and determine the 29-kD fragment. Alternatively, the decrease in cytosolic gasdermin D at 24h could be due to protein degradation at late stages of pyroptosis. These alternative mechanisms will need further studies in future.
